# Supplementary material for: Mitogenomic analyses support the recent division of the genus Orthotrichum (Orthotrichaceae, Bryophyta)
Source: PubMed Central journal article supplement (PMC5493672; doi:10.1038/s41598-017-04833-z), 2017-06-30

## Mitogenomic analyses support the recent division of the genus *Orthotrichum* (Orthotrichaceae, Bryophyta)

Jakub Sawicki, Vítězslav Plášek, Ryszard Ochyra, Monika Szczecińska, Monika Ślipiko, Kamil Myszczyński and Tomasz Kulik

**Supplementary Table S1.** Sample species, voucher specimens and sequencing results of species used in this study. The newly sequenced specimens are bolded.

| Species                                                     | voucher                                                | sequencing results                       | mitogenome length | mitogenome coverage | GenBank accession number |
|-------------------------------------------------------------|--------------------------------------------------------|------------------------------------------|-------------------|---------------------|--------------------------|
| <i>Lewinskya incana</i> ( <i>Orthotrichum incanum</i> )     | El Rosario, Chile, NYBG 1010874                        | <b>2,643,409 2x300bp pair-end reads</b>  | <b>104,736</b>    | <b>57x</b>          | <b>KX578028</b>          |
| <i>Lewinskya speciosa</i> ( <i>Orthotrichum speciosum</i> ) | Sawicki et al. 2014                                    |                                          | 104,747           | 87x                 | KM288416                 |
| <i>Nyholmiella gymnostoma</i>                               | Notre Dame Bay, Canada, NYBG 151512                    | <b>3,077,215 2x300bp pair-end reads</b>  | <b>104,638</b>    | <b>69x</b>          | <b>KX578030</b>          |
| <i>Nyholmiella obtusifolia</i>                              | Olsztyn, Poland, OL-M 10109                            | <b>6,234,126 2x250bp pair-end reads</b>  | <b>104,603</b>    | <b>105x</b>         | <b>KX702279</b>          |
| <i>Orthotrichum callistomum</i>                             | Yulong Xue Shan, China, KUN B0012532                   | <b>2,618,194 2x300bp pair-end reads</b>  | <b>104,785</b>    | <b>58x</b>          | <b>KX578029</b>          |
| <i>Orthotrichum diaphanum</i>                               | Vigalondo et al. 2016                                  |                                          | 104,756           | 106x                | KT373970                 |
| <i>Orthotrichum macrocephalum</i>                           | Vigalondo et al. 2016                                  |                                          | 104,624           | 60x                 | KT823696                 |
| <i>Orthotrichum rogeri</i>                                  | Sawicki et al. 2015                                    |                                          | 104,634           | 61x                 | KM873610                 |
| <i>Orthotrichum pulchellum</i>                              | Olloy, Belgium, OP186523                               | <b>3,002,982 2x250bp pair-end reads</b>  | <b>104,759</b>    | <b>68x</b>          | <b>KR297063</b>          |
| <i>Orthotrichum stellatum</i>                               | Liu et al. 2014                                        |                                          | 104,131           | unknown             | KC784958                 |
| <i>Pulviger a lyellii</i> ( <i>Orthotrichum lyellii</i> )   | Orlovice, Czech Republic, TC8912                       | <b>3,208,238 2x300 bp pair-end reads</b> | <b>104,704</b>    | <b>77x</b>          | <b>KR297064</b>          |
| <i>Plenogemma phyllantha</i> ( <i>Ulota phyllantha</i> )    | Lærdalsøyri, Norway, OSTR B493                         | <b>3,924,686 2x250bp pair-end reads</b>  | <b>104,671</b>    | <b>72x</b>          | <b>KX578033</b>          |
| <i>Stoneobryum bunyaense</i>                                | Kiangaro Mts, Australia, US 00070599                   | <b>3,668,008 2x300 bp pair-end reads</b> | <b>104,352</b>    | <b>59x</b>          | <b>KX578031</b>          |
| <i>Stoneobryum mirium</i>                                   | South Africa, Amatola Mountains, Katberg, DUKE 0016791 | <b>9,601,004 2x300 bp pair-end reads</b> | <b>104,345</b>    | <b>130x</b>         | <b>KY620883</b>          |
| <i>Ulota crispa</i>                                         | Blansko, Czech republic, OP OP187011                   | <b>4,340,122 2x250bp pair-end reads</b>  | <b>104,636</b>    | <b>67x</b>          | <b>KX578032</b>          |
| <i>Ulota hutchinsiae</i>                                    | Liu et al. 2014                                        |                                          | 104,608           | unknown             | KC784952                 |
| <i>Zygodon viridissimus</i>                                 | Couvin, Belgium, OP186541                              | <b>2,998,756 2x250bp pair-end reads</b>  | <b>103,098</b>    | <b>48x</b>          | <b>KX711975</b>          |

**Supplementary Table S2.** Mutations found in the alignment (excluding outgroup) i coding and non-coding regions of the thirteen mitogenomes.

| Coding Regions |                      |     |       |     |                |                | Spacers and Introns   |                      |     |       |     |                |
|----------------|----------------------|-----|-------|-----|----------------|----------------|-----------------------|----------------------|-----|-------|-----|----------------|
| Gene           | Fragment length (bp) | SNP | Indel | All | Non-synonymous | % of variation | Region                | Fragment length (bp) | SNP | Indel | All | % of variation |
| <i>ccmFC</i>   | 1,455                | 38  | 0     | 38  | 27             | 2.61           | <i>cox1</i> intron 4  | 1,798                | 64  | 81    | 145 | 8.06           |
| <i>tatC</i>    | 735                  | 19  | 0     | 19  | 10             | 2.59           | <i>cob/nad9</i>       | 1,982                | 104 | 31    | 135 | 6.81           |
| <i>sdh3</i>    | 396                  | 9   | 0     | 9   | 5              | 2.27           | <i>nad1/cob</i>       | 365                  | 14  | 10    | 24  | 6.58           |
| <i>rps3</i>    | 1,617                | 35  | 0     | 35  | 19             | 2.16           | <i>ccmFN/ccmFC</i>    | 270                  | 7   | 10    | 17  | 6.30           |
| <i>ccmFN</i>   | 1,896                | 39  | 1     | 40  | 26             | 2.11           | <i>nad6/cox2</i>      | 2,982                | 107 | 53    | 160 | 5.37           |
| <i>rps14</i>   | 300                  | 5   | 1     | 6   | 3              | 2.00           | <i>cox1</i> intron 2  | 397                  | 15  | 6     | 21  | 5.29           |
| <i>rpl2</i>    | 1,392                | 27  | 0     | 27  | 16             | 1.94           | <i>cox2/cox3</i>      | 19                   | 1   | 0     | 1   | 5.26           |
| <i>sdh4</i>    | 261                  | 4   | 1     | 5   | 3              | 1.92           | <i>nad7/rpl2</i>      | 748                  | 36  | 3     | 39  | 5.21           |
| <i>rps7</i>    | 693                  | 11  | 1     | 12  | 7              | 1.73           | <i>nad4L/sdh4</i>     | 302                  | 14  | 1     | 15  | 4.97           |
| <i>ccmB</i>    | 528                  | 9   | 0     | 9   | 1              | 1.70           | <i>nad3/nad7</i>      | 3,144                | 119 | 36    | 155 | 4.93           |
| <i>nad4L</i>   | 303                  | 5   | 0     | 5   | 0              | 1.65           | <i>cox1/atp9</i>      | 2,029                | 67  | 33    | 100 | 4.93           |
| <i>cob</i>     | 1,221                | 20  | 0     | 20  | 9              | 1.64           | <i>rps13/rps11</i>    | 473                  | 15  | 8     | 23  | 4.86           |
| <i>rps1</i>    | 810                  | 12  | 1     | 13  | 6              | 1.60           | <i>rpl16/rpl5</i>     | 749                  | 31  | 5     | 36  | 4.81           |
| <i>ccmC</i>    | 759                  | 12  | 0     | 12  | 8              | 1.58           | <i>rps3/rpl16</i>     | 21                   | 1   | 0     | 1   | 4.76           |
| <i>rps4</i>    | 588                  | 9   | 0     | 9   | 6              | 1.53           | <i>ccmC/ccmFN</i>     | 129                  | 5   | 1     | 6   | 4.65           |
| <i>atp8</i>    | 525                  | 8   | 0     | 8   | 3              | 1.52           | <i>atp9</i> intron 3  | 1,556                | 58  | 14    | 72  | 4.63           |
| <i>atp1</i>    | 1,557                | 23  | 0     | 23  | 7              | 1.48           | <i>rps4/tatC</i>      | 735                  | 28  | 6     | 34  | 4.63           |
| <i>atp4</i>    | 552                  | 7   | 1     | 8   | 3              | 1.45           | <i>nad2</i> intron 1  | 979                  | 40  | 4     | 44  | 4.49           |
| <i>rpl5</i>    | 561                  | 7   | 0     | 7   | 3              | 1.25           | <i>sdh4/sdh3</i>      | 278                  | 8   | 4     | 12  | 4.32           |
| <i>cox1</i>    | 1,569                | 19  | 0     | 19  | 2              | 1.21           | <i>cox3/nad1</i>      | 1,231                | 36  | 17    | 53  | 4.31           |
| <i>nad2</i>    | 1,470                | 17  | 0     | 17  | 3              | 1.16           | <i>sdh3</i> intron 1  | 910                  | 30  | 9     | 39  | 4.29           |
| <i>nad1</i>    | 987                  | 11  | 0     | 11  | 6              | 1.11           | <i>ccmFC</i> intron 1 | 780                  | 30  | 3     | 33  | 4.23           |
| <i>rps13</i>   | 369                  | 4   | 0     | 4   | 2              | 1.08           | <i>rps11/atp9</i>     | 646                  | 25  | 2     | 27  | 4.18           |
| <i>atp6</i>    | 759                  | 8   | 0     | 8   | 5              | 1.05           | <i>rps1/rps2</i>      | 946                  | 33  | 5     | 38  | 4.02           |
| <i>rpl10</i>   | 540                  | 5   | 0     | 5   | 2              | 0.93           | <i>nad4L</i> intron 1 | 1,775                | 55  | 16    | 71  | 4.00           |
| <i>atp9</i>    | 225                  | 2   | 0     | 2   | 2              | 0.89           | <i>nad1</i> intron 1  | 752                  | 28  | 2     | 30  | 3.99           |
| <i>nad6</i>    | 606                  | 5   | 0     | 5   | 2              | 0.83           | <i>ccmFC/rps4</i>     | 2,736                | 89  | 20    | 109 | 3.98           |
| <i>rps12</i>   | 381                  | 3   | 0     | 3   | 0              | 0.79           | <i>nad9</i> intron 1  | 2046                 | 68  | 13    | 81  | 3.96           |
| <i>cox3</i>    | 798                  | 6   | 0     | 6   | 3              | 0.75           | <i>atp9</i> intron 2  | 1,196                | 43  | 3     | 46  | 3.85           |
| <i>rpl16</i>   | 408                  | 3   | 0     | 3   | 1              | 0.74           | <i>cox2</i> intron 3  | 1,438                | 42  | 11    | 53  | 3.69           |
| <i>nad5</i>    | 2,031                | 14  | 0     | 14  | 5              | 0.69           | <i>tatC/nad4L</i>     | 788                  | 23  | 6     | 29  | 3.68           |
| <i>nad4</i>    | 1,488                | 10  | 0     | 10  | 1              | 0.67           | <i>rps14/rpl6</i>     | 606                  | 19  | 3     | 22  | 3.63           |
| <i>rpl6</i>    | 306                  | 2   | 0     | 2   | 0              | 0.65           | <i>cox1</i> intron 1  | 1,638                | 56  | 3     | 59  | 3.60           |
| <i>rps11</i>   | 357                  | 2   | 0     | 2   | 0              | 0.56           | <i>atp6/nad6</i>      | 1,250                | 40  | 5     | 45  | 3.60           |
| <i>rps2</i>    | 726                  | 4   | 0     | 4   | 2              | 0.55           | <i>cob</i> intron 1   | 947                  | 25  | 9     | 34  | 3.59           |
| <i>cox2</i>    | 762                  | 4   | 0     | 4   | 0              | 0.52           | <i>rpl10/nad5</i>     | 1,190                | 35  | 7     | 42  | 3.53           |
| <i>nad7</i>    | 1,182                | 5   | 0     | 5   | 0              | 0.42           | <i>cox2</i> intron 2  | 1,406                | 47  | 1     | 48  | 3.41           |
| <i>rps19</i>   | 282                  | 1   | 0     | 1   | 0              | 0.35           | <i>atp9</i> intron 1  | 1,417                | 43  | 4     | 47  | 3.32           |
| <i>nad9</i>    | 588                  | 2   | 0     | 2   | 2              | 0.34           | <i>atp1</i> intron 1  | 1,157                | 35  | 3     | 38  | 3.28           |
| <i>nad3</i>    | 357                  | 1   | 0     | 1   | 0              | 0.28           | <i>nad5/nad4</i>      | 623                  | 14  | 6     | 20  | 3.21           |
|                |                      |     |       |     |                |                | <i>nad2/rps12</i>     | 1,779                | 45  | 11    | 56  | 3.15           |

|  |  |  |  |  |  |  |                      |        |     |    |     |      |
|--|--|--|--|--|--|--|----------------------|--------|-----|----|-----|------|
|  |  |  |  |  |  |  | <i>nad7</i> intron 2 | 1,021  | 28  | 4  | 32  | 3.13 |
|  |  |  |  |  |  |  | <i>rps2/ccmB</i>     | 161    | 4   | 1  | 5   | 3.11 |
|  |  |  |  |  |  |  | <i>nad7</i> intron 1 | 1,032  | 27  | 5  | 32  | 3.10 |
|  |  |  |  |  |  |  | <i>rps12/atp6</i>    | 746    | 21  | 2  | 23  | 3.08 |
|  |  |  |  |  |  |  | <i>nad5</i> intron 2 | 840    | 21  | 4  | 25  | 2.98 |
|  |  |  |  |  |  |  | <i>sdh3/rpl10</i>    | 10,761 | 227 | 77 | 304 | 2.83 |
|  |  |  |  |  |  |  | <i>nad9/atp1</i>     | 466    | 10  | 3  | 13  | 2.79 |
|  |  |  |  |  |  |  | <i>cox1</i> intron 3 | 2,648  | 72  | 1  | 73  | 2.76 |
|  |  |  |  |  |  |  | <i>nad5</i> intron 1 | 852    | 20  | 2  | 22  | 2.58 |
|  |  |  |  |  |  |  | <i>nad4</i> intron 1 | 781    | 17  | 3  | 20  | 2.56 |
|  |  |  |  |  |  |  | <i>atpB/rps1</i>     | 483    | 11  | 1  | 12  | 2.48 |
|  |  |  |  |  |  |  | <i>ccmB/ccmC</i>     | 506    | 9   | 2  | 11  | 2.17 |
|  |  |  |  |  |  |  | <i>atp6</i> intron 1 | 618    | 10  | 3  | 13  | 2.10 |
|  |  |  |  |  |  |  | <i>nad5</i> intron 3 | 2,632  | 49  | 0  | 49  | 1.86 |
|  |  |  |  |  |  |  | <i>atp1/nad3</i>     | 539    | 10  | 0  | 10  | 1.86 |
|  |  |  |  |  |  |  | <i>nad1</i> intron 2 | 859    | 14  | 1  | 15  | 1.75 |
|  |  |  |  |  |  |  | <i>cox2</i> intron 1 | 1,028  | 13  | 1  | 14  | 1.36 |
|  |  |  |  |  |  |  | <i>cox3</i> intron 1 | 831    | 11  | 0  | 11  | 1.32 |
|  |  |  |  |  |  |  | <i>nad4/nad2</i>     | 26     | 0   | 0  | 0   | 0.00 |
|  |  |  |  |  |  |  | <i>rpl2/rps19</i>    | 3      | 0   | 0  | 0   | 0.00 |
|  |  |  |  |  |  |  | <i>rps19/rps3</i>    | 6      | 0   | 0  | 0   | 0.00 |
|  |  |  |  |  |  |  | <i>rpl5/rps14</i>    | 4      | 0   | 0  | 0   | 0.00 |
|  |  |  |  |  |  |  | <i>rpl6/rps13</i>    | 3      | 0   | 0  | 0   | 0.00 |

**Supplementary Table S3.** The partitions with optimal substitution models generated by the PartitionFinder2.

| Subset | Best Model | Number of sites | Partition names                                                                                                                                                                                                                                                                                                                                                             |
|--------|------------|-----------------|-----------------------------------------------------------------------------------------------------------------------------------------------------------------------------------------------------------------------------------------------------------------------------------------------------------------------------------------------------------------------------|
| 1      | GTR+I+G    | 879             | <i>atp6</i> _intron_1, start_trnI-CAU                                                                                                                                                                                                                                                                                                                                       |
| 2      | GTR        | 2225            | <i>nad4</i> _exon_2_pos2, <i>nad5</i> _exon_2_pos1, <i>nad2</i> _exon_1_pos1, <i>cob</i> _exon_2_pos1, trnR-UCU, trnG-UCC, trnW-CCA, trnI-CAU, trnY-GUA_nad4L, trnK-UUU, <i>nad7</i> _exon_2_pos2, trnY-GUA, trnV-UAC, trnA-UGC, trnE-UUC, <i>nad7</i> _exon_3_pos2, <i>cox2</i> _exon_3_pos3, <i>nad9</i> _exon_2_pos3, <i>cox3</i> _exon_2_pos2, <i>atp9</i> _exon_3_pos3 |
| 3      | GTR        | 1525            | trnI-CAU_trnK-UUU, rpl16_CDS_pos3, rpl10_CDS_pos3, rps12_CDS_pos3, <i>atp1</i> _exon_1_pos3, rps14_CDS_pos3, <i>ccmFC</i> _exon_1_pos3, <i>atp1</i> _exon_2_pos2                                                                                                                                                                                                            |
| 4      | GTR+G      | 5099            | rps1_trnC-GCA, trnI-CAU_cox1, tatC_trnR-UCU, trnA-UGC_trnT-GGU, <i>cob</i> _nad9, trnV-UAC_trnD-GUC                                                                                                                                                                                                                                                                         |
| 5      | GTR        | 1521            | tatC_CDS_pos2, <i>sdh4</i> _CDS_pos2, <i>sdh3</i> _exon_2_pos2, <i>cox1</i> _exon_5_pos1, <i>sdh3</i> _exon_1_pos2, trnG-UCC_rps4, <i>sdh4</i> _CDS_pos1, <i>atp6</i> _exon_1_pos3, <i>cox1</i> _exon_1_pos2, tatC_CDS_pos3, <i>cox1</i> _exon_3_pos1, rps4_CDS_pos1, <i>nad4L</i> _exon_1_pos2                                                                             |
| 6      | GTR+I+G    | 1541            | rps12_CDS_pos1, rps13_CDS_pos1, <i>cox1</i> _exon_1_pos3, <i>atp6</i> _exon_1_pos1, rps7_CDS_pos1, <i>nad9</i> _exon_2_pos1, <i>cox1</i> _exon_3_pos2, rpl6_CDS_pos1, <i>cox1</i> _exon_5_pos2, rpl16_CDS_pos1, rpl16_CDS_pos2, rps12_CDS_pos2, <i>cox2</i> _exon_1_pos1                                                                                                    |
| 7      | GTR        | 927             | <i>cox1</i> _exon_5_pos3, trnL-UAG, trnS-UGA, trnR-ACG, trnP-UGG, rps11_CDS_pos2, <i>cox1</i> _exon_2_pos3, rps19_CDS_pos2, rrn5_rRNA, trnQ-UUG                                                                                                                                                                                                                             |
| 8      | GTR+I+G    | 1798            | <i>cox1</i> _intron_4                                                                                                                                                                                                                                                                                                                                                       |
| 9      | GTR        | 528             | <i>atp9</i> _exon_1_pos3, <i>atp6</i> _exon_2_pos2, <i>nad4L</i> _exon_1_pos3, <i>nad4</i> _nad2, <i>cox1</i> _exon_2_pos2, rps3_rpl16, <i>cox1</i> _exon_4_pos1                                                                                                                                                                                                            |
| 10     | GTR        | 380             | <i>cox1</i> _exon_4_pos2, <i>nad4L</i> _exon_1_pos1, <i>cox2</i> _exon_4_pos1, <i>atp1</i> _exon_2_pos1                                                                                                                                                                                                                                                                     |

|    |         |      |                                                                                                                                                                                                                                                       |
|----|---------|------|-------------------------------------------------------------------------------------------------------------------------------------------------------------------------------------------------------------------------------------------------------|
| 11 | GTR     | 616  | tatC_CDS_pos1, cox1_exon_4_pos3, sdh3_exon_1_pos3, ccmC_ccmFN, sdh3_exon_2_pos1                                                                                                                                                                       |
| 12 | GTR+I+G | 2648 | cox1_intron_3                                                                                                                                                                                                                                         |
| 13 | GTR+I+G | 1787 | atp6_exon_2_pos3, cox1_exon_1_pos1, rpl10_CDS_pos1, cox1_exon_3_pos3, cox2_exon_3_pos1, nad7_exon_3_pos3, atp8_CDS_pos1, trnH-GUG, atp1_exon_1_pos2, cox2_exon_1_pos2, trnL-UAA                                                                       |
| 14 | GTR     | 1213 | rps4_tatC, cox1_intron_2, trnL-CAA                                                                                                                                                                                                                    |
| 15 | GTR+I+G | 1788 | nad5_exon_4_pos3, nad1_exon_2_pos1, nad5_exon_2_pos3, nad3_CDS_pos3, ccmB_CDS_pos2, atp9_exon_4_pos1, nad5_exon_4_pos2, cox1_exon_2_pos1, nad1_exon_3_pos1, nad9_exon_2_pos2, cox2_exon_2_pos1, cox3_exon_1_pos1, nad2_exon_1_pos2, ccmFC_exon_2_pos1 |
| 16 | GTR+G   | 4768 | sdh3_intron_1, atp4_CDS_pos2, nad4L_intron_1, cox1_intron_1, ccmFN_ccmFC                                                                                                                                                                              |
| 17 | GTR     | 1385 | trnF-GAA, rps14_CDS_pos1, ccmC_CDS_pos1, nad4_exon_1_pos1, rps2_CDS_pos2, nad7_exon_1_pos2, nad7_exon_2_pos3, atp4_CDS_pos1, rpl5_CDS_pos2, rps11_CDS_pos3                                                                                            |
| 18 | GTR     | 919  | rps2_ccmB, nad4_exon_2_pos1, trnH-GUG_trnL-CAA, rpl6_CDS_pos3, atp4_CDS_pos3, atp9_exon_2_pos3, nad9_exon_1_pos2                                                                                                                                      |
| 19 | GTR+I+G | 1980 | ccmFN_CDS_pos3, rpl2_CDS_pos3, rps3_CDS_pos3, atp8_CDS_pos3, atp8_CDS_pos2                                                                                                                                                                            |
| 20 | GTR+I+G | 2206 | atp6_nad6, atpB_rps1, rps13_rps11                                                                                                                                                                                                                     |
| 21 | GTR+G   | 1205 | nad5_exon_3_pos3, nad4_exon_1_pos3, ccmC_CDS_pos3, rps1_CDS_pos1, ccmFC_exon_1_pos2, rps19_rps3                                                                                                                                                       |
| 22 | GTR     | 900  | rps1_CDS_pos2, ccmB_CDS_pos1, rpl10_CDS_pos2, ccmFC_exon_2_pos2, nad9_exon_1_pos1                                                                                                                                                                     |
| 23 | GTR     | 1458 | nad5_exon_2_pos2, cox3_exon_2_pos3, rps1_CDS_pos3, atp9_exon_1_pos2, cob_exon_1_pos2, cob_exon_2_pos2, ccmC_CDS_pos2, cox3_exon_2_pos1, nad1_exon_2_pos3                                                                                              |
| 24 | GTR     | 1011 | rps2_CDS_pos1, trnG-GCC_trnR-ACG, nad5_exon_4_pos1, rps13_CDS_pos2, rpl6_CDS_pos2, cox2_exon_2_pos2, trnC-GCA, rps19_CDS_pos1                                                                                                                         |
| 25 | GTR+I+G | 3156 | atp1_trnW-CCA, trnC-GCA_trnF-GAA, atp9_end, rrn18_trnM-CAU, ccmFC_exon_1_pos1, nad3_trnV-UAC, cob_exon_1_pos1                                                                                                                                         |
| 26 | GTR+G   | 132  | trnF-GAA_rps2, trnS-UGA_trnG-UCC                                                                                                                                                                                                                      |
| 27 | GTR     | 716  | nad7_exon_2_pos1, nad7_exon_1_pos3, nad9_exon_1_pos3, nad4L_exon_2_pos3, rps4_CDS_pos3, rps13_CDS_pos3, rps2_CDS_pos3                                                                                                                                 |
| 28 | GTR     | 1324 | nad7_exon_3_pos1, nad6_CDS_pos3, nad2_exon_2_pos3, ccmB_CDS_pos3, nad5_exon_1_pos3, cox2_exon_3_pos2                                                                                                                                                  |
| 29 | GTR+I+G | 5927 | nad9_atp1, sdh4_CDS_pos3, ccmFN_CDS_pos2, trnL-UAG_trnS-UGA, sdh4_sdh3, ccmFC_exon_2_pos3, ccmFN_CDS_pos1, cob_intron_1, cox3_nad1, ccmB_ccmC                                                                                                         |
| 30 | GTR+I+G | 3316 | ccmFC_intron_1, nad9_intron_1, nad2_trnG-GCC                                                                                                                                                                                                          |
| 31 | GTR     | 51   | ccmFC_trnQ-UUG                                                                                                                                                                                                                                        |
| 32 | GTR     | 2657 | rpl10_trnH-GUG, trnMf-CAU_rrn26, rps11_atp9, trnQ-UUG_trnL-UAG                                                                                                                                                                                        |
| 33 | GTR+I+G | 582  | atp6_exon_2_pos1, sdh3_exon_2_pos3, rps4_CDS_pos2, cox2_exon_4_pos2, trnW-CCA_nad3                                                                                                                                                                    |
| 34 | GTR+I+G | 827  | nad4L_sdh4, trnR-UCU_trnY-GUA, nad1_cob                                                                                                                                                                                                               |
| 35 | GTR+I+G | 7018 | atp9_intron_3, cox2_intron_2, rps7_CDS_pos3, nad5_nad4, atp9_intron_1, rps3_CDS_pos1, rrn5_trnMf-CAU, nad7_intron_2, nad4L_exon_2_pos1                                                                                                                |
| 36 | GTR     | 4539 | nad4_intron_1, trnD-GUC, cox3_exon_1_pos2, trnG-GCC, nad5_intron_1, nad1_intron_2, rrn18_rRNA, nad4L_exon_2_pos2                                                                                                                                      |
| 37 | GTR+I+G | 482  | nad3_CDS_pos1, atp9_exon_4_pos2, nad5_exon_1_pos1, atp6_exon_1_pos2, sdh3_exon_1_pos1, nad1_exon_2_pos2, cox2_exon_4_pos3                                                                                                                             |
| 38 | GTR     | 658  | nad1_exon_3_pos3, nad1_exon_1_pos2, sdh3_trnP_UGG, nad4_exon_1_pos2, atp9_exon_4_pos3, nad2_exon_1_pos3, nad6_CDS_pos2                                                                                                                                |
| 39 | GTR+I+G | 3366 | trnP-UGG_rrn18, trnE-UUC_rps12, rrn26_rpl10                                                                                                                                                                                                           |
| 40 | GTR     | 2573 | trnM-CAU, rps14_CDS_pos2, trnMf-CAU, rpl2_CDS_pos2, cox2_intron_1, cox3_intron_1                                                                                                                                                                      |
| 41 | GTR+I+G | 3905 | trnM-CAU_rrn5, nad6_cox2                                                                                                                                                                                                                              |
| 42 | GTR     | 3604 | rrn26_rRNA, nad1_exon_1_pos1, rps11_CDS_pos1                                                                                                                                                                                                          |
| 43 | GTR+I+G | 1625 | trnR-ACG_trnE-UUC, rps7_CDS_pos2, trnL-UAA_nad5                                                                                                                                                                                                       |
| 44 | GTR     | 198  | atp9_exon_3_pos2, atp9_exon_2_pos2, nad5_exon_1_pos2, nad1_exon_3_pos2                                                                                                                                                                                |
| 45 | GTR     | 1568 | nad5_intron_2, rpl5_CDS_pos1, rps3_CDS_pos2                                                                                                                                                                                                           |
| 46 | GTR     | 874  | nad6_CDS_pos1, nad5_exon_3_pos1, nad2_exon_2_pos1                                                                                                                                                                                                     |

|    |         |      |                                                                                                                           |
|----|---------|------|---------------------------------------------------------------------------------------------------------------------------|
| 47 | GTR+I+G | 1392 | cox2_exon_2_pos3, nad3_CDS_pos2, nad2_exon_2_pos2, nad4_exon_2_pos3, nad5_exon_3_pos2, cox3_exon_1_pos3, atp9_exon_3_pos1 |
| 48 | GTR     | 2632 | nad5_intron_3                                                                                                             |
| 49 | GTR     | 1731 | nad2_intron_1, nad1_intron_1                                                                                              |
| 50 | GTR+I+G | 1352 | rps7_atp6, rps14_rpl6                                                                                                     |
| 51 | GTR+I+G | 413  | rpL5_CDS_pos3, rps19_CDS_pos3, cox2_exon_1_pos3, nad1_exon_1_pos3                                                         |
| 52 | GTR+I+G | 5412 | atp9_intron_2, atp1_intron_1, cox2_intron_3, rpl2_CDS_pos1, atp1_exon_2_pos3, nad7_intron_1                               |
| 53 | GTR+I+G | 407  | cob_exon_2_pos3, cob_exon_1_pos3                                                                                          |
| 54 | GTR     | 469  | atp9_exon_2_pos1, atp1_exon_1_pos1, atp9_exon_1_pos1, nad7_exon_1_pos1                                                    |
| 55 | GTR+G   | 2314 | nad7_rpl2, trnD-GUC_trnA-UGC, rpl16_rpl5                                                                                  |

**Supplementary Figures SF1-4.** The phylogenetic relationships of 17 Orthotrichaceae species based on partitioned mitogenomic datasets: SF1-AllCDS – dataset based on all protein-coding sequences, SF1-20CDS dataset based on 20 most variable sequenced; SF3-AllNC – dataset based on all non-coding regions; SF4-20NC – dataset based on the 20 most variable non-coding regions. The bootstrap values (ML) are given at nodes. The nodes with underlined bootstrap values are not supported by BI analyses (posterior probabilities lower than 0.95).

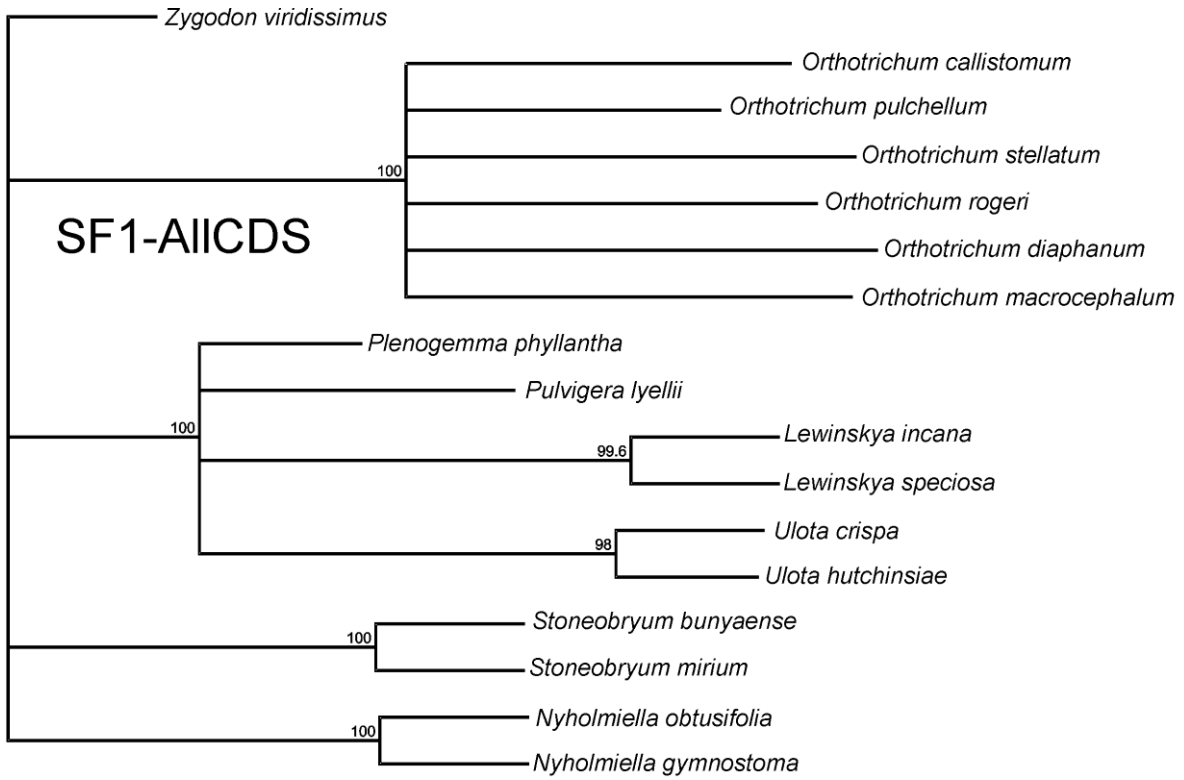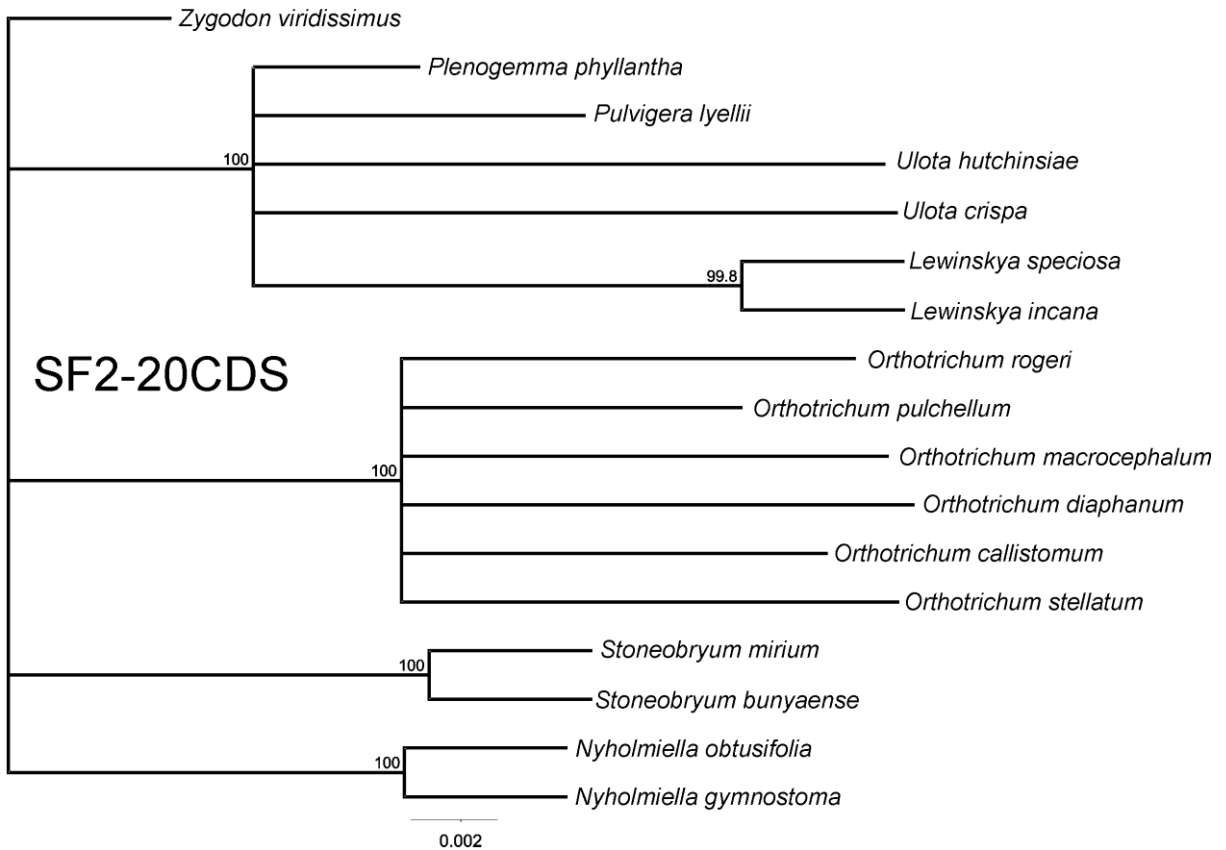

### SF3-ALLNC

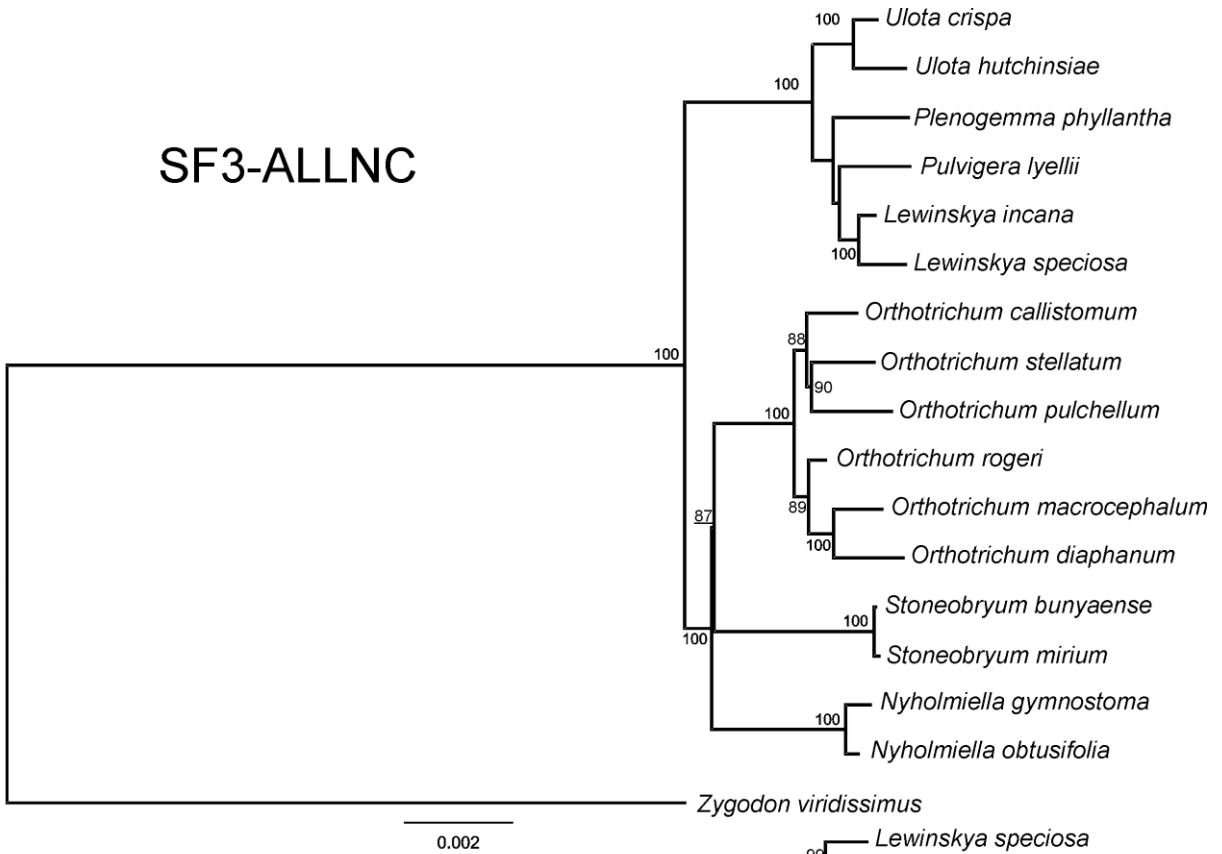

### SF4-20NC

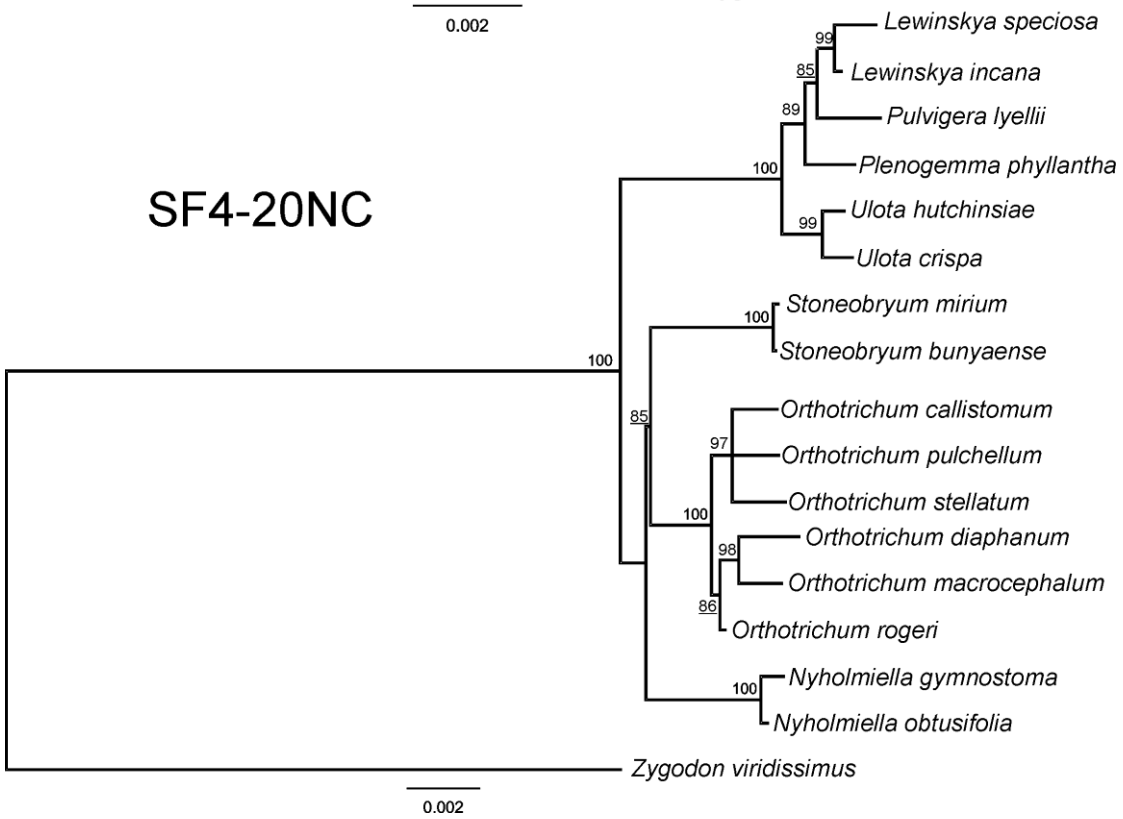

Supplement: 41598_2017_4833_MOESM1_ESM.pdf [file 41598_2017_4833_MOESM1_ESM.pdf]
